# Supplementary material for: Detailed quasiclassical dynamics of the F− + SiH3Cl multi-channel reaction
Source: Royal Society of Chemistry journal article supplement (doi:10.1039/d4cp00048j), 2024-01-01
Supplement: d4cp00048j1.pdf [file d4cp00048j1.pdf]

## Detailed quasiclassical dynamics of the $F^- + SiH_3Cl$ multi-channel reaction

### Electronic Supplementary Information

**Attila Á. Dékány and Gábor Czako\***

MTA-SZTE Lendület Computational Reaction Dynamics Research Group, Interdisciplinary Excellence Centre  
and Department of Physical Chemistry and Materials Science, Institute of Chemistry, University of Szeged,

Rerrich Béla tér 1, Szeged H-6720, Hungary

\* E-mail: gczako@chem.u-szeged.hu

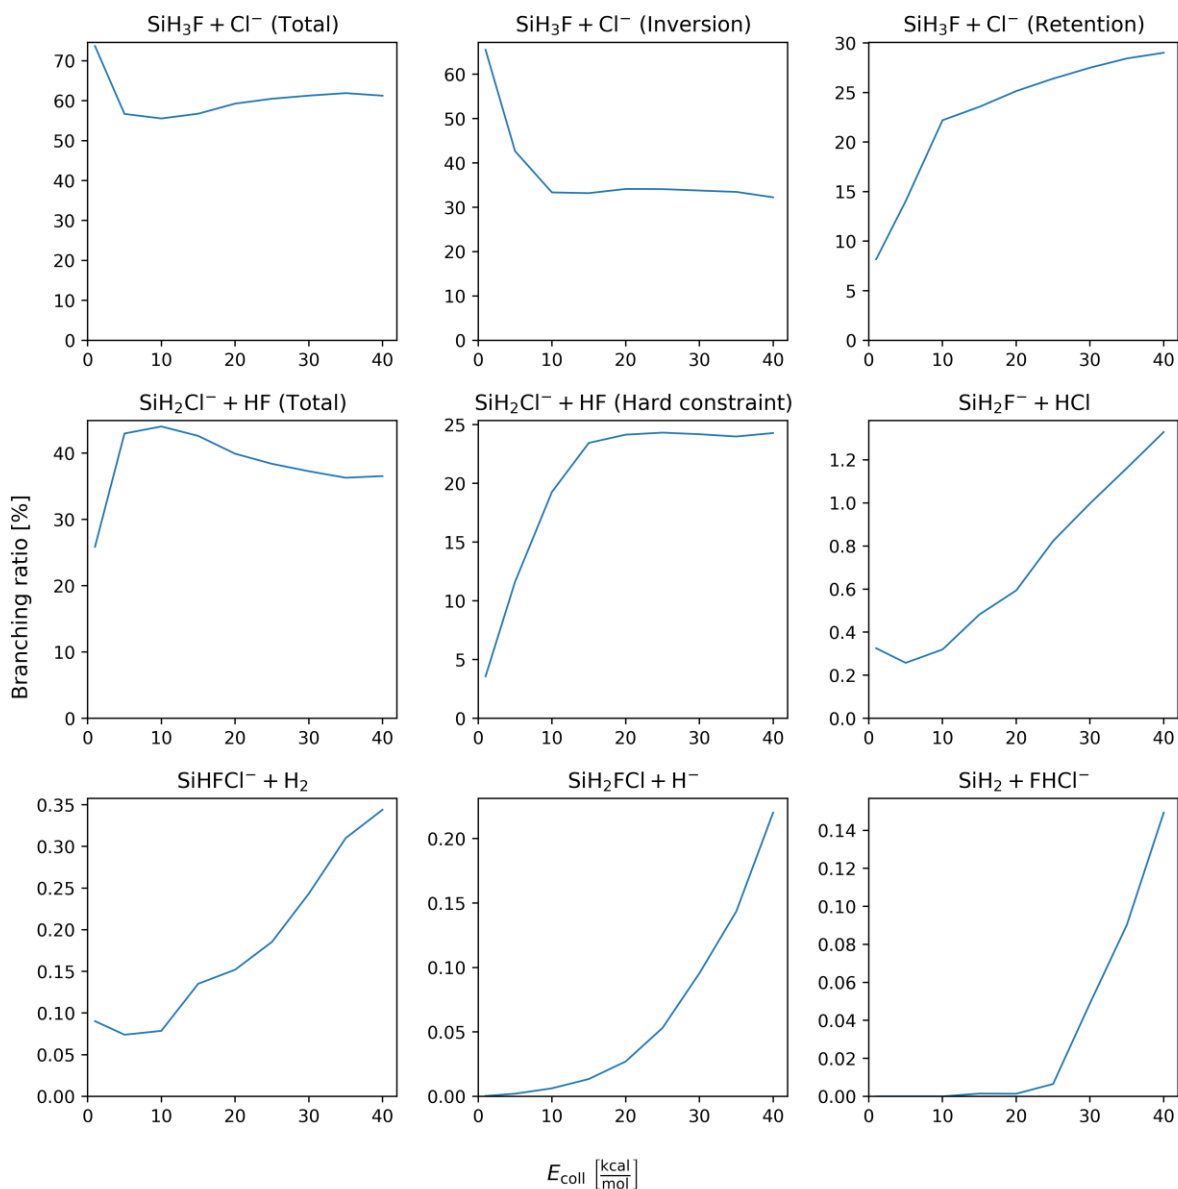

**Figure S1.** Branching ratios of the  $\text{SiH}_3\text{Cl} + \text{F}^- \rightarrow \text{A} + \text{B}$  reactions as a function of collision energy. These ratios were calculated by dividing the cross section of the given product channel (with or without constraints) by the vibrationally-unconstrained total cross section.

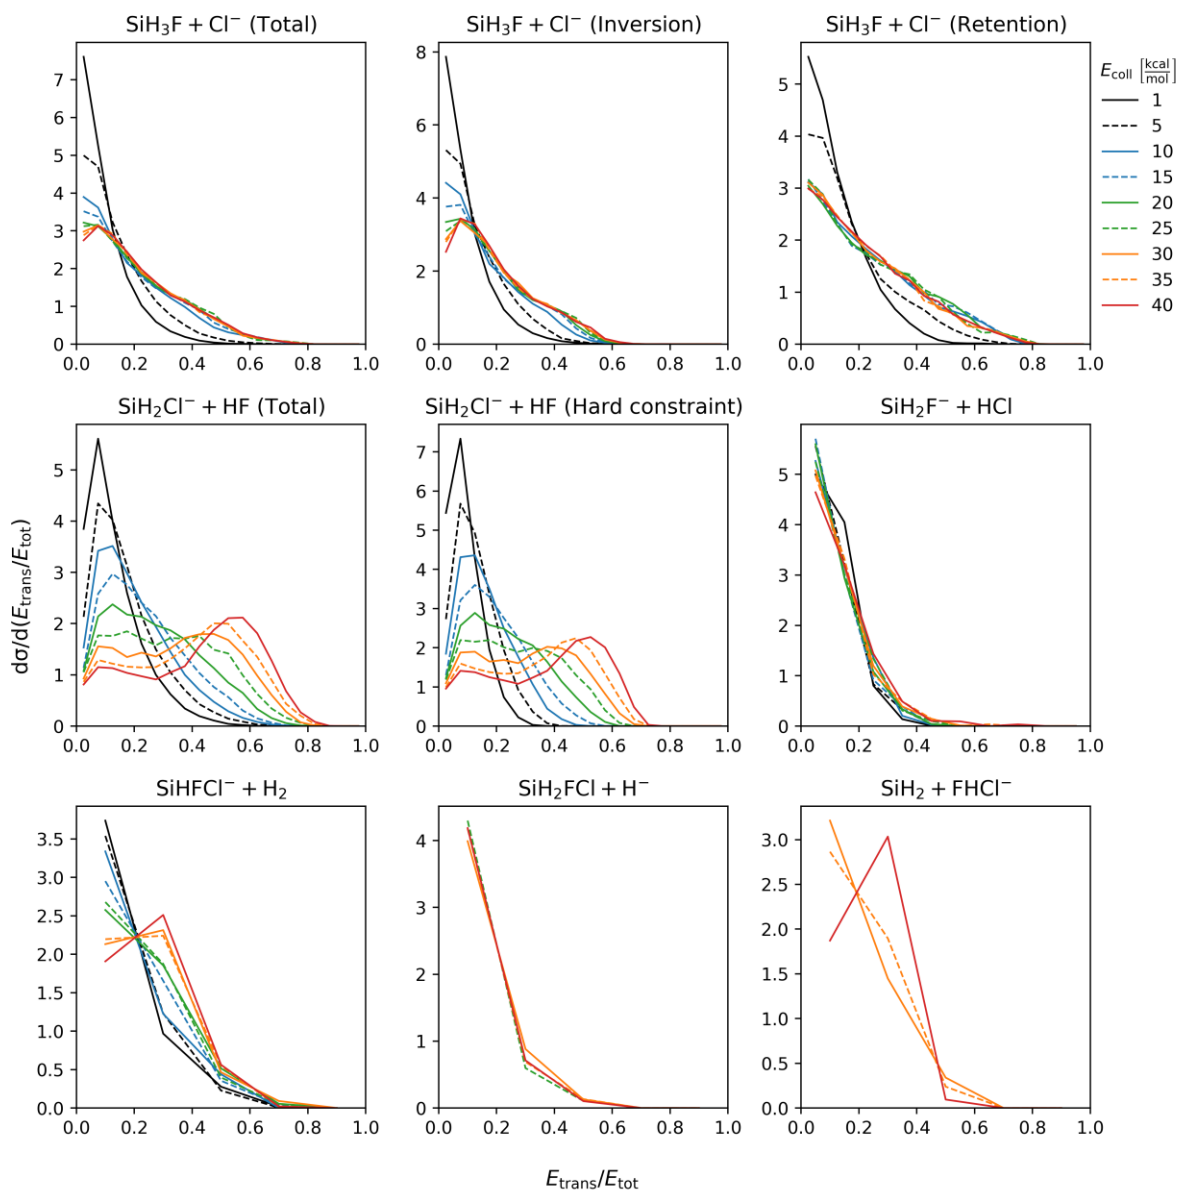

**Figure S2.**  $E_{\text{trans}}/E_{\text{tot}}$  distributions of the  $\text{SiH}_3\text{Cl} + \text{F}^- \rightarrow \text{A} + \text{B}$  reactions as a function of collision energy.

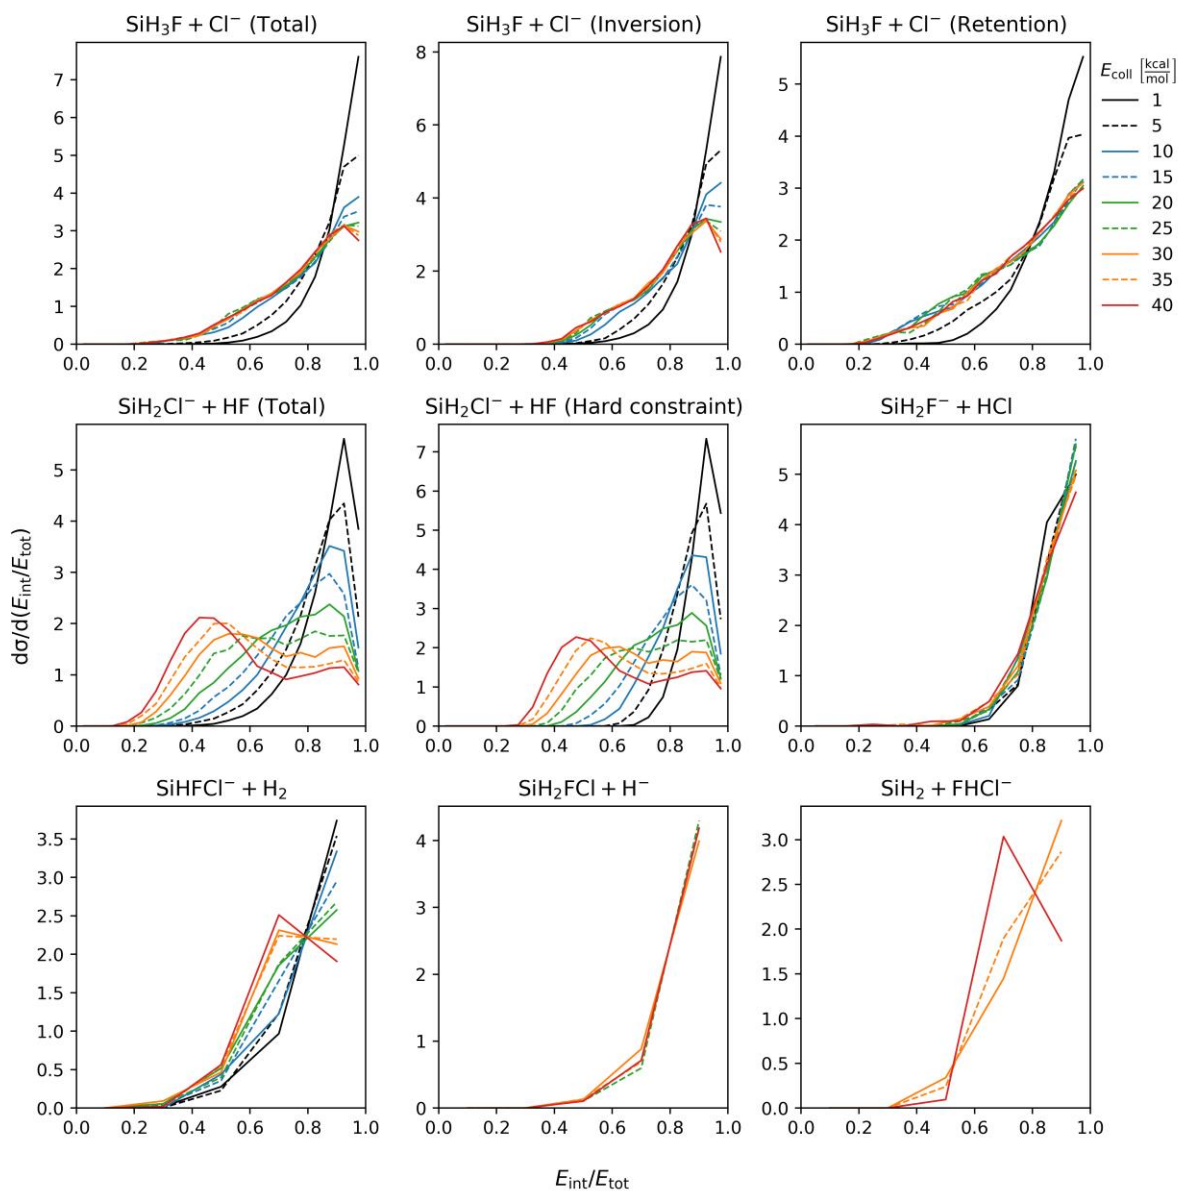

**Figure S3.**  $E_{\text{int}}/E_{\text{tot}}$  distributions of the  $\text{SiH}_3\text{Cl} + \text{F}^- \rightarrow \text{A} + \text{B}$  reactions as a function of collision energy.

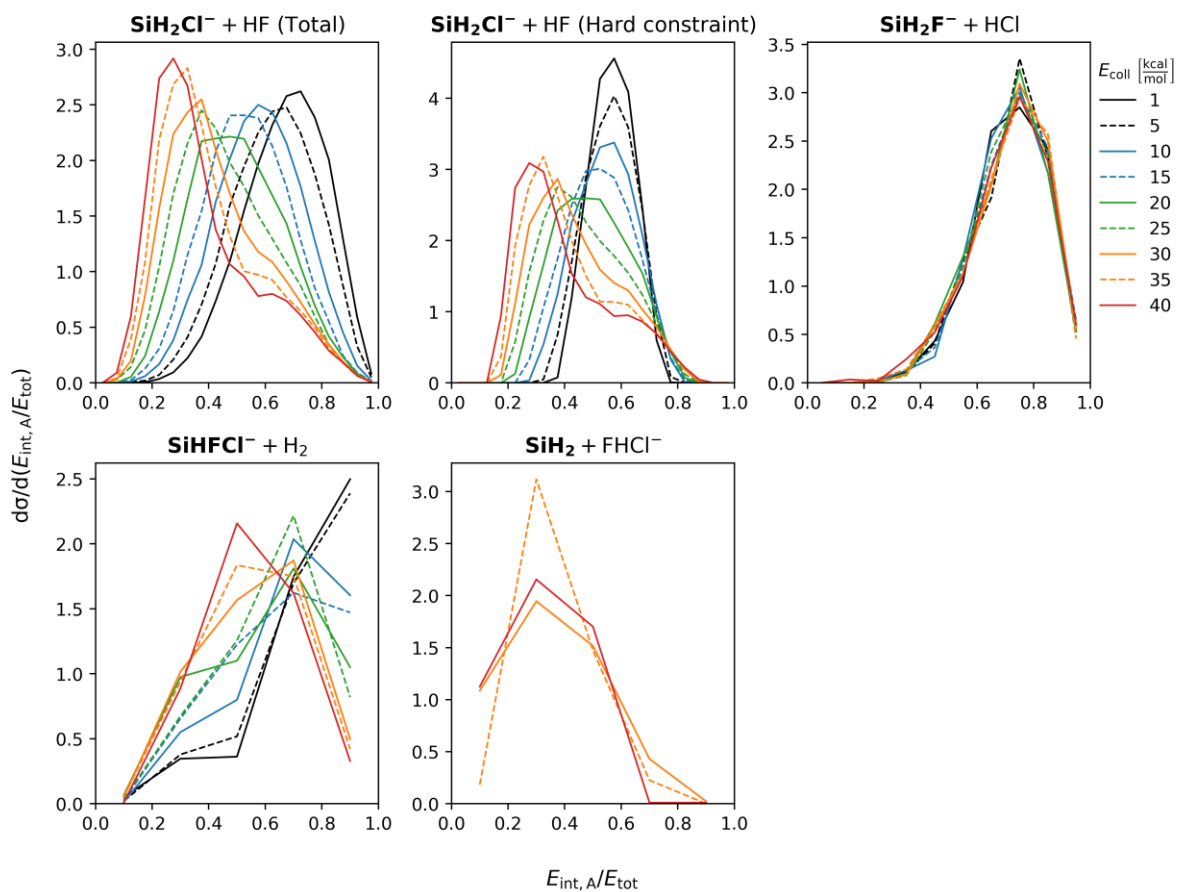

**Figure S4.**  $E_{int,A}/E_{tot}$  distributions of the  $\text{SiH}_3\text{Cl} + \text{F}^- \rightarrow \text{A} + \text{B}$  reactions as a function of collision energy where both A and B are polyatomic.

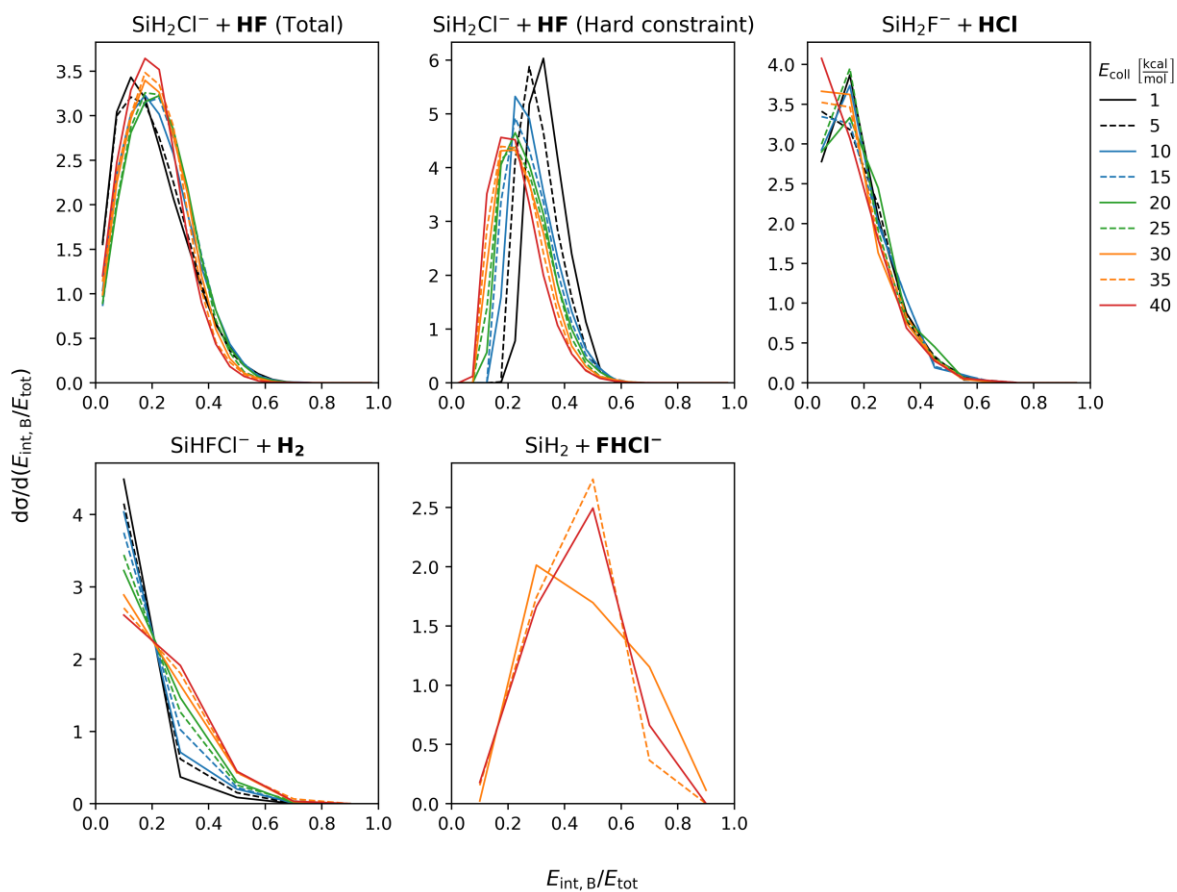

**Figure S5.**  $E_{int,B}/E_{tot}$  distributions of the  $\text{SiH}_3\text{Cl} + \text{F}^- \rightarrow \text{A} + \text{B}$  reactions as a function of collision energy where both A and B are polyatomic.

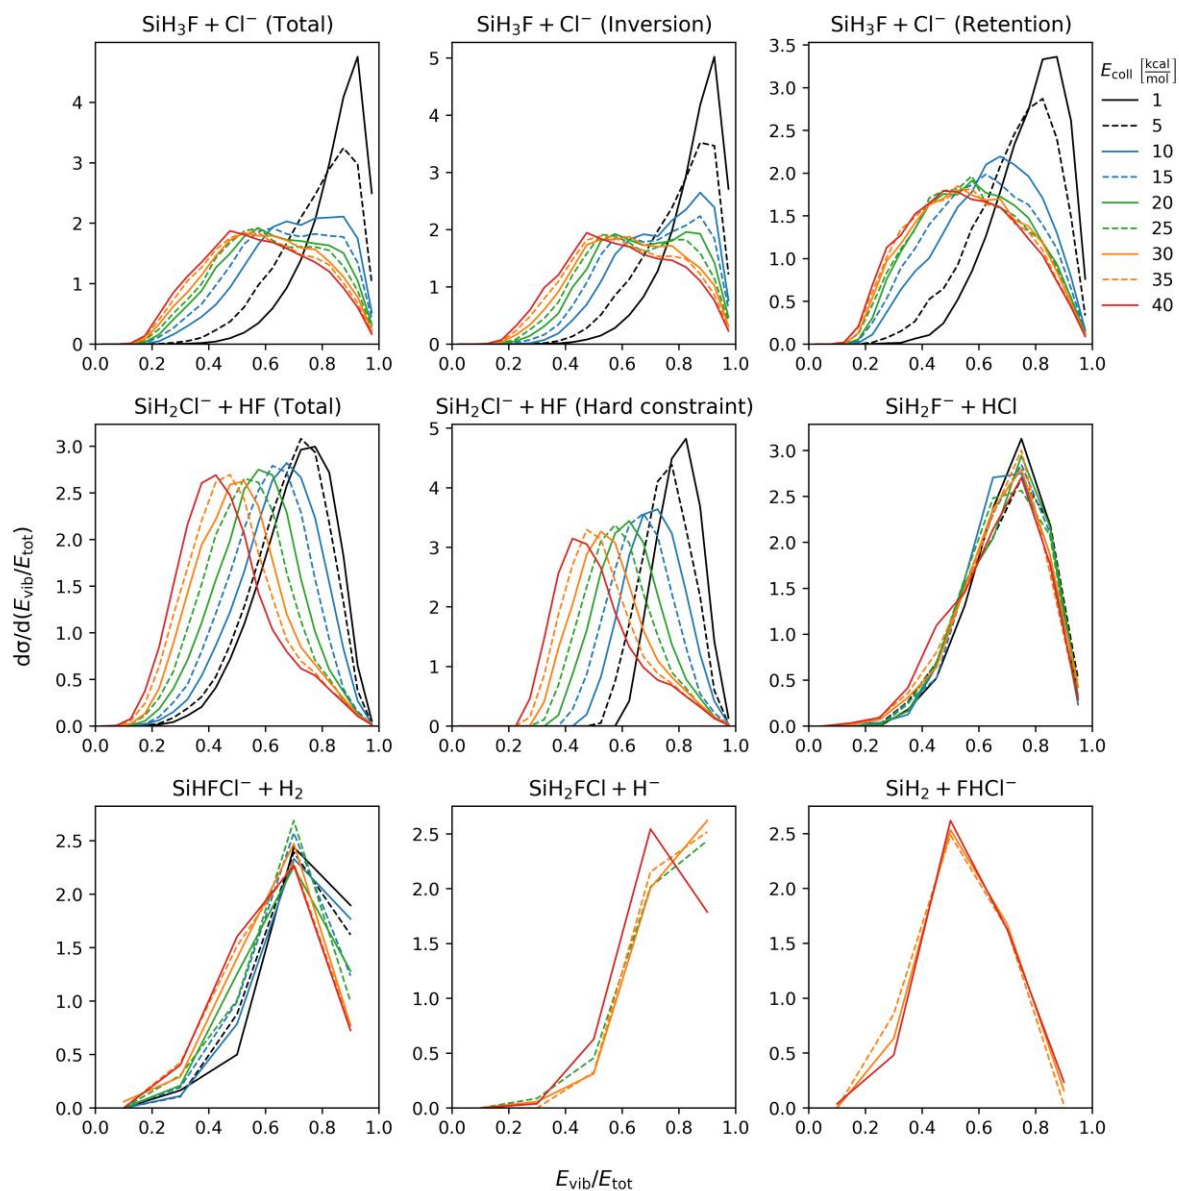

**Figure S6.**  $E_{\text{vib}}/E_{\text{tot}}$  distributions of the  $\text{SiH}_3\text{Cl} + \text{F}^- \rightarrow \text{A} + \text{B}$  reactions as a function of collision energy.

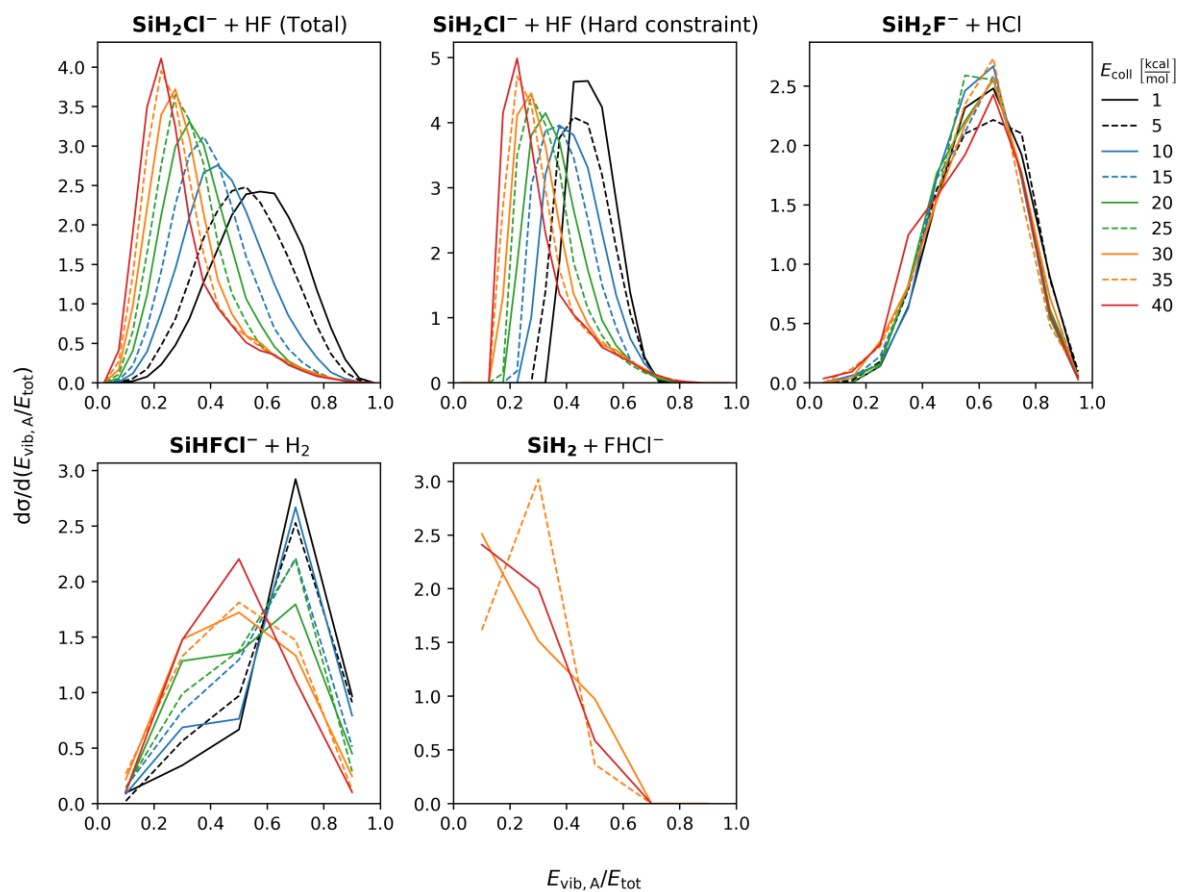

**Figure S7.**  $E_{\text{vib},A}/E_{\text{tot}}$  distributions of the  $\text{SiH}_3\text{Cl} + \text{F}^- \rightarrow \text{A} + \text{B}$  reactions as a function of collision energy where both A and B are polyatomic.



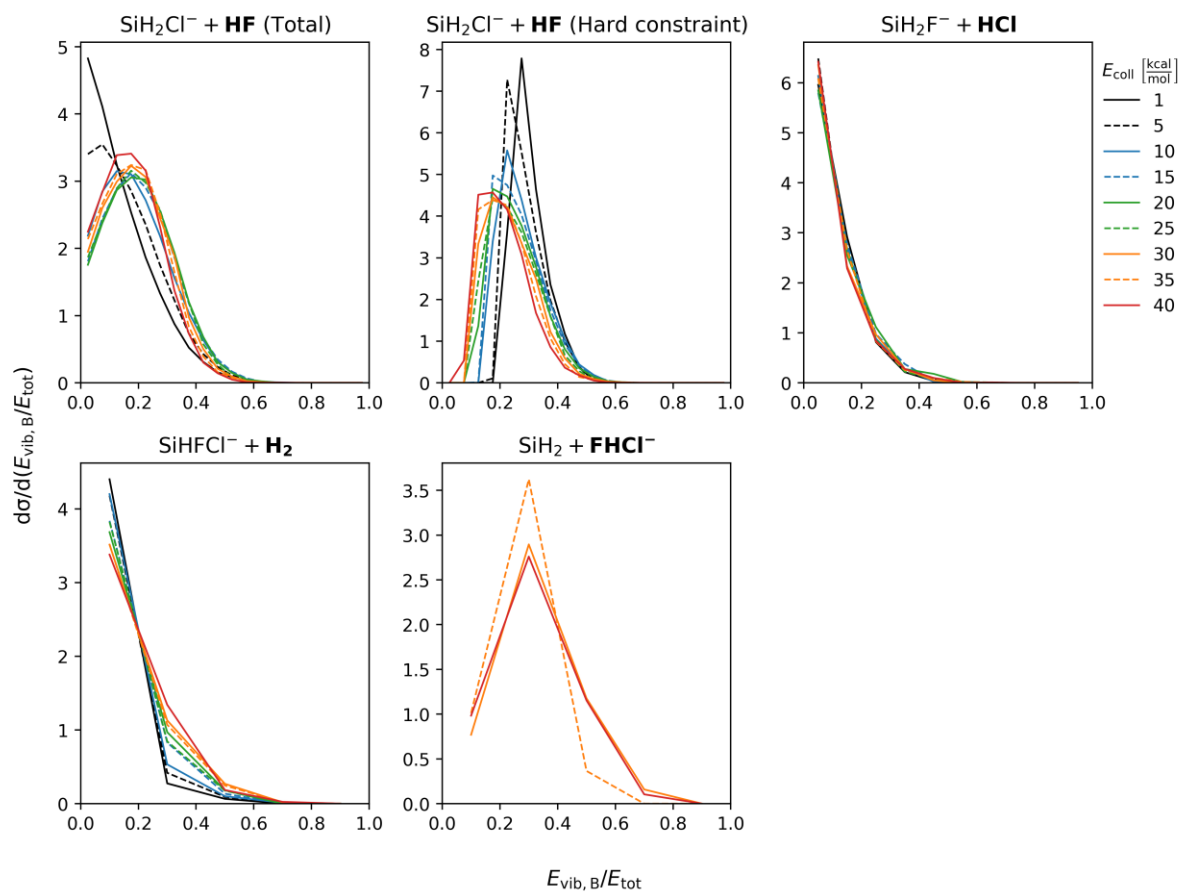

**Figure S8.**  $E_{\text{vib},B}/E_{\text{tot}}$  distributions of the  $\text{SiH}_3\text{Cl} + \text{F}^- \rightarrow \text{A} + \text{B}$  reactions as a function of collision energy where both A and B are polyatomic.

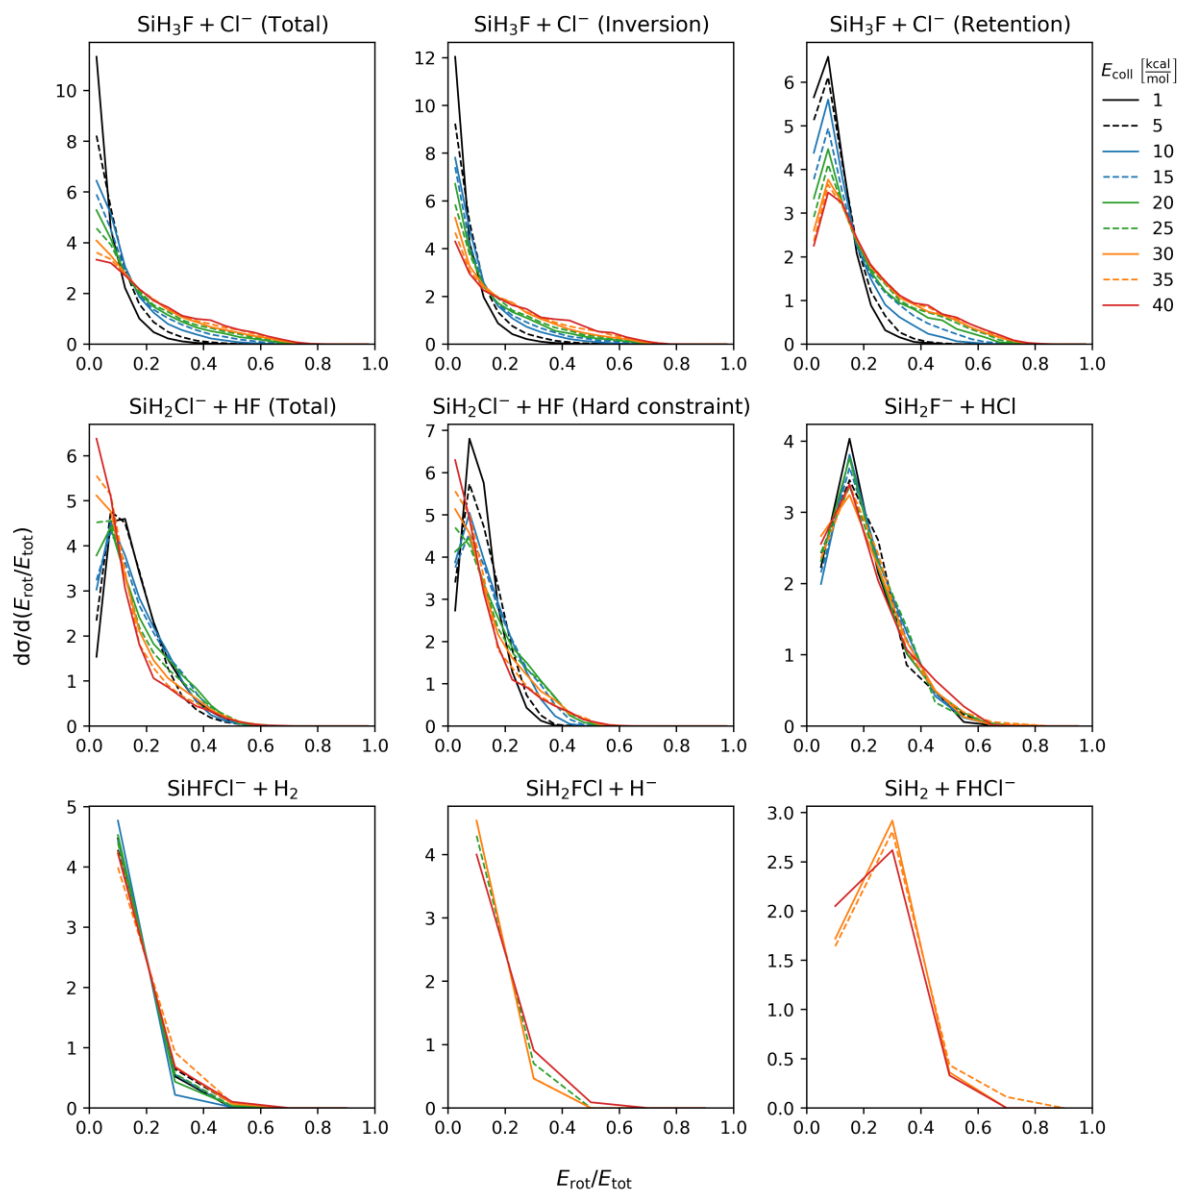

**Figure S9.**  $E_{\text{rot}}/E_{\text{tot}}$  distributions of the  $\text{SiH}_3\text{Cl} + \text{F}^- \rightarrow \text{A} + \text{B}$  reactions as a function of collision energy.

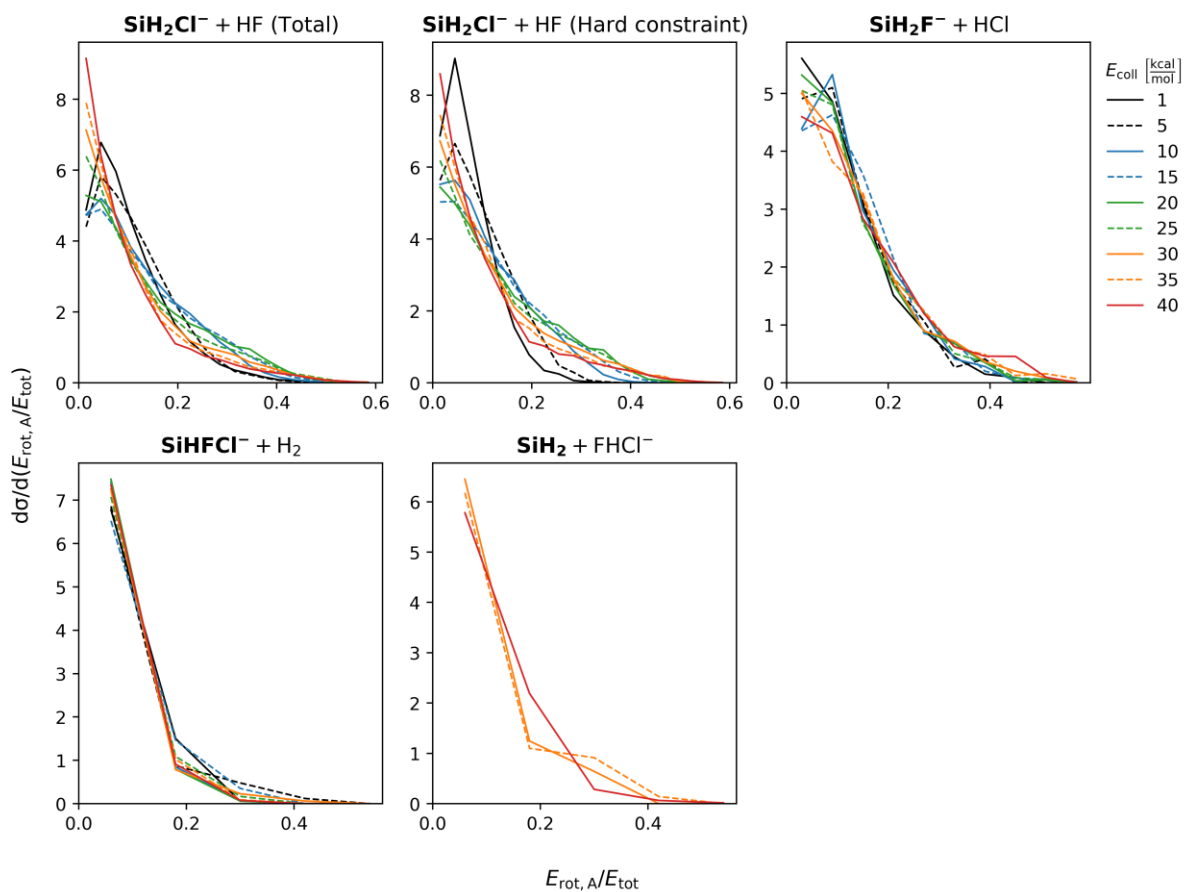

**Figure S10.**  $E_{rot,A}/E_{tot}$  distributions of the  $\text{SiH}_3\text{Cl} + \text{F}^- \rightarrow \text{A} + \text{B}$  reactions as a function of collision energy where both A and B are polyatomic.

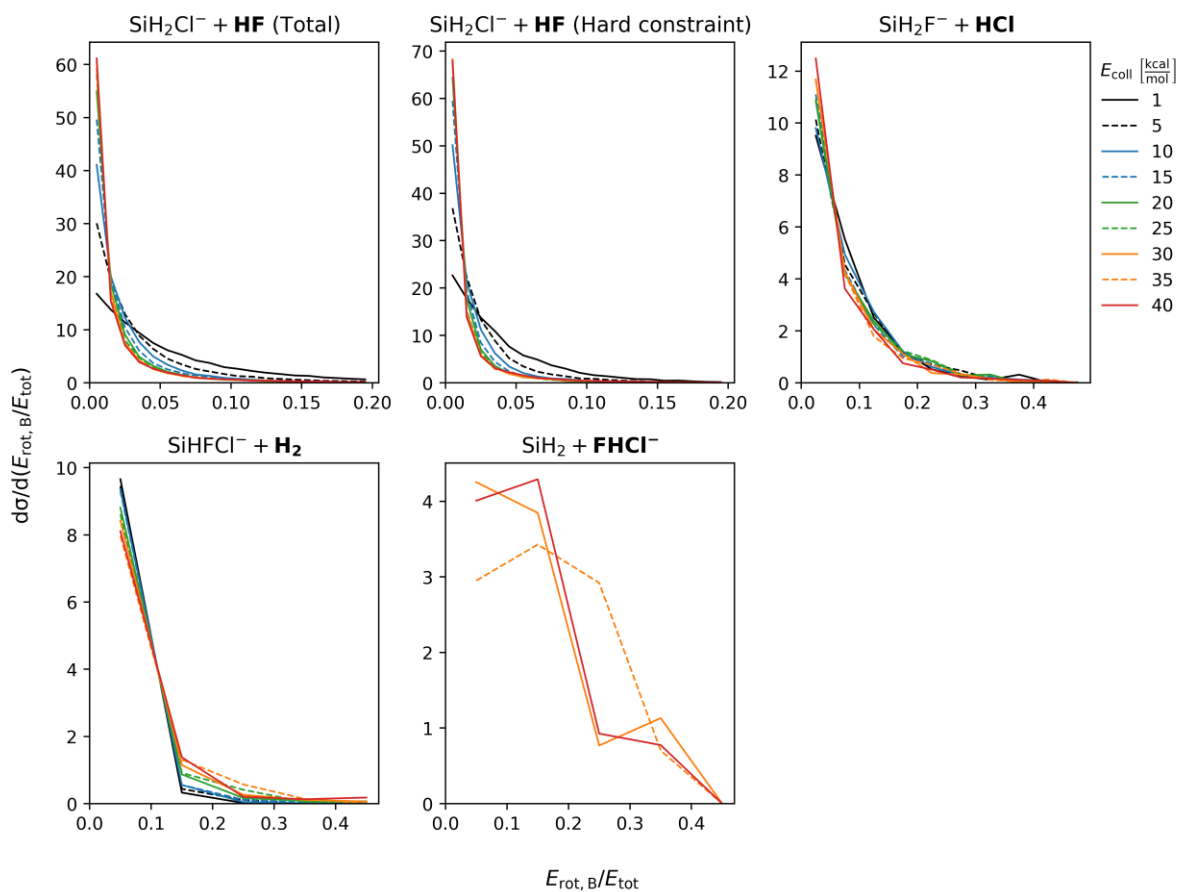

**Figure S11.**  $E_{rot,B}/E_{tot}$  distributions of the  $\text{SiH}_3\text{Cl} + \text{F}^- \rightarrow \text{A} + \text{B}$  reactions as a function of collision energy where both A and B are polyatomic.

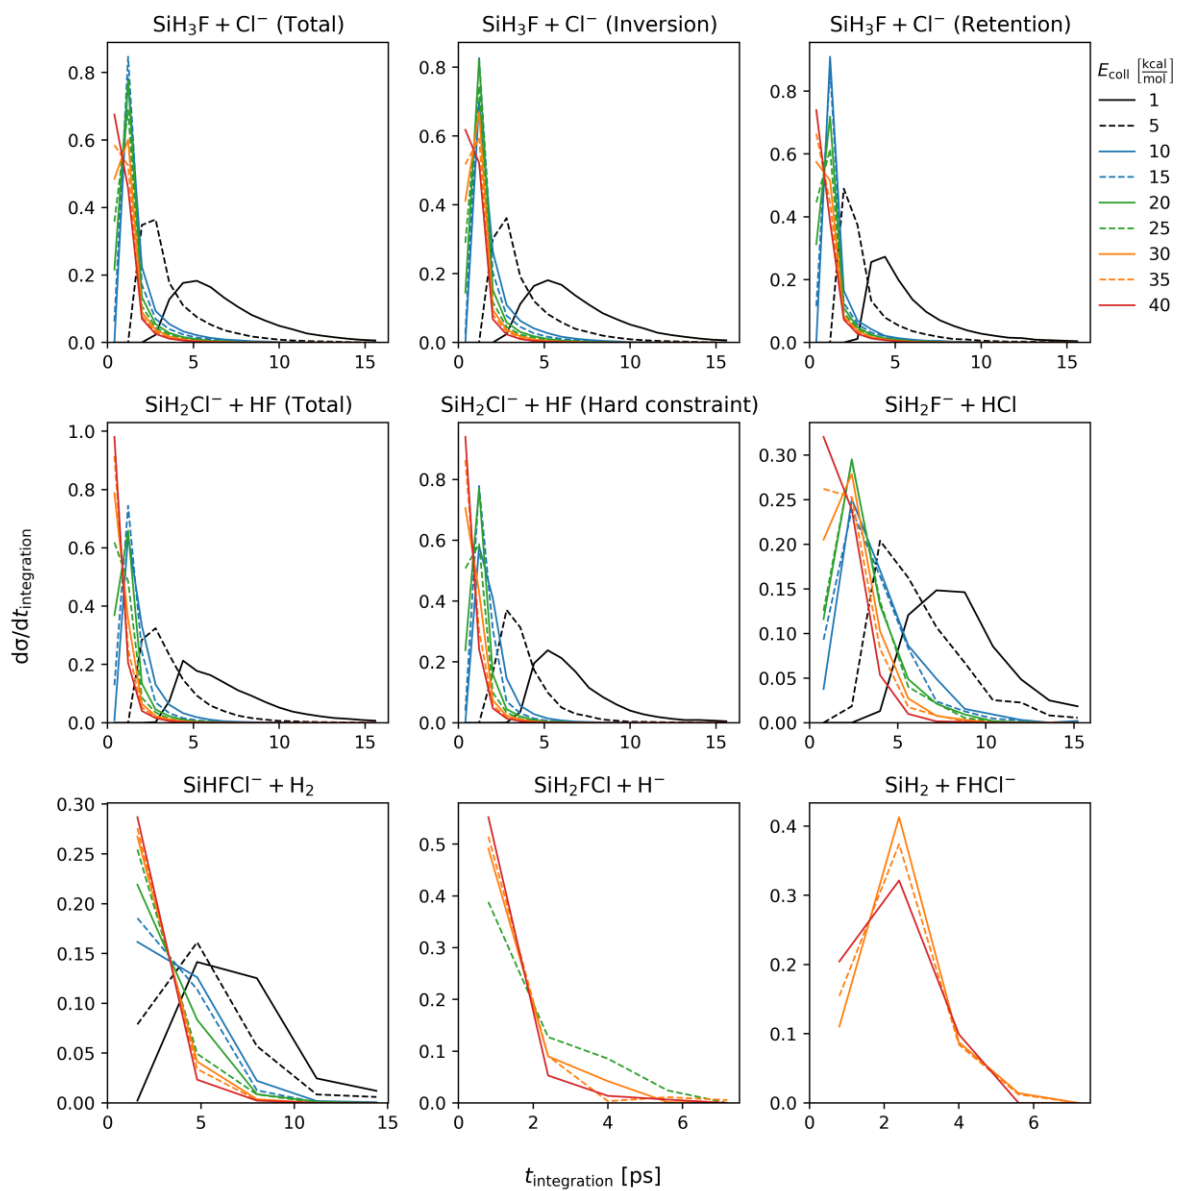

**Figure S12.** Integration time distributions of the  $\text{SiH}_3\text{Cl} + \text{F}^- \rightarrow \text{A} + \text{B}$  reactions as a function of collision energy.
